# Supplementary material for: Commercial Fe- or Co-containing carbon nanotubes as catalysts for NH3decomposition
Source: Royal Society of Chemistry journal article supplement (doi:10.1039/b700969k), 2007-01-01

Fig. S1. SEM and TEM images of fresh Co- (a, b) and Fe-containing (c, d) CNTs.

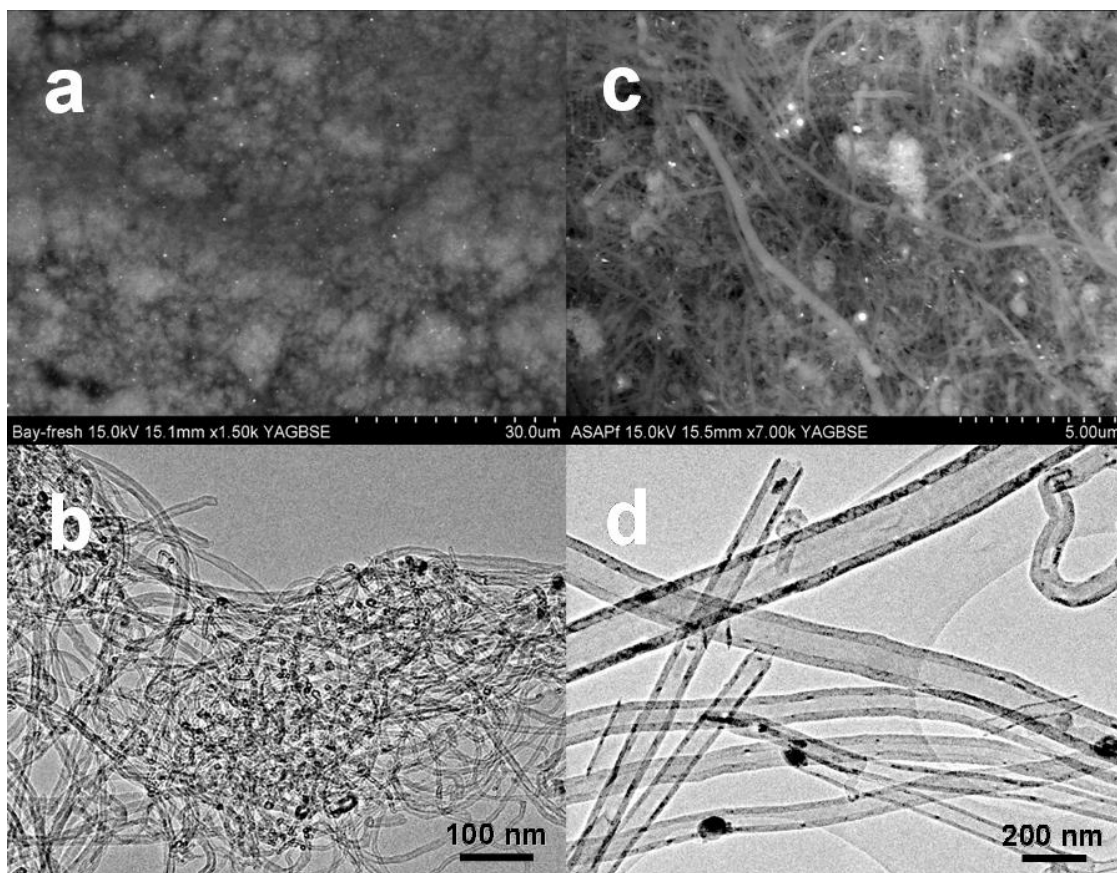

Fig. S2. EDX spectra of CNTs (up) and metal particles (down) in TEM images of Co-containing CNTs (Fig. 1a). Signal of Cu originates from the Cu grid.

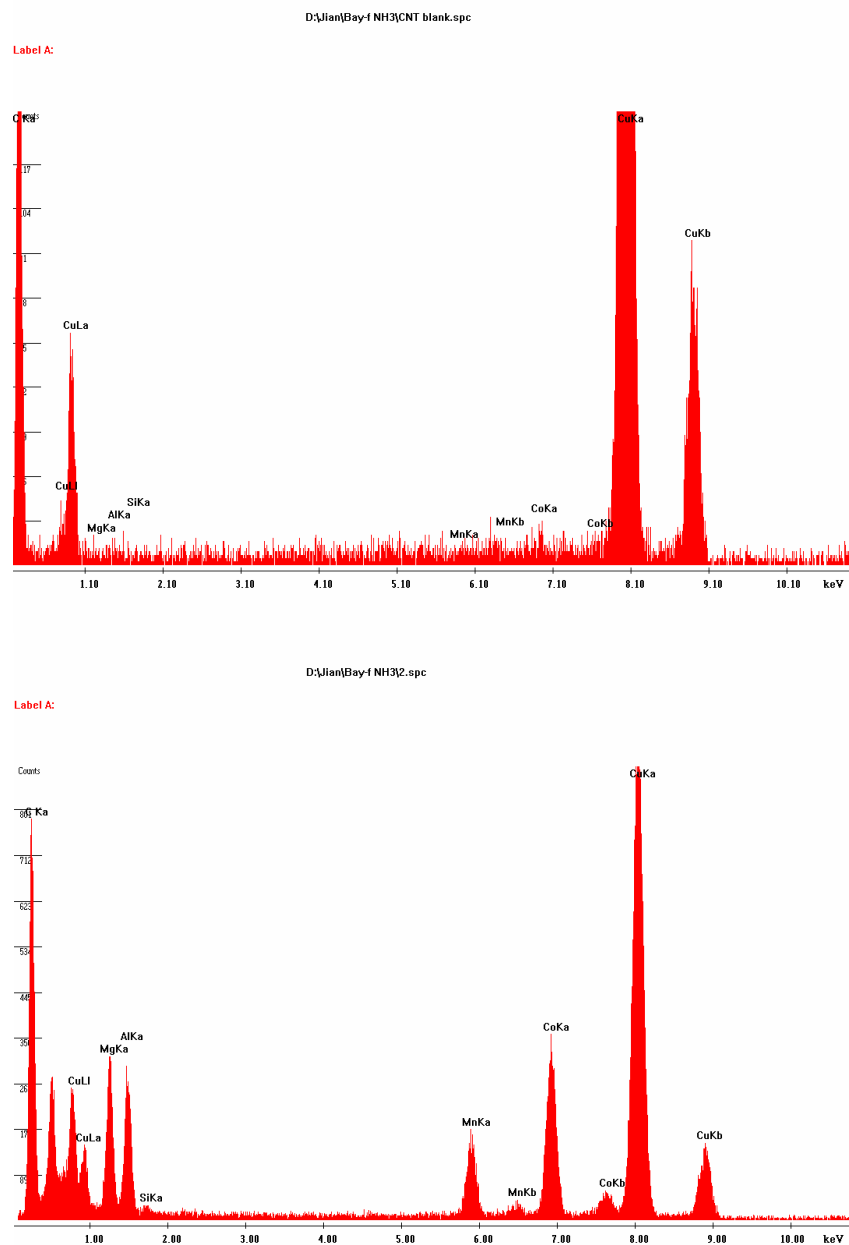

Fig. S3. XPS spectra of fresh and used CNTs.

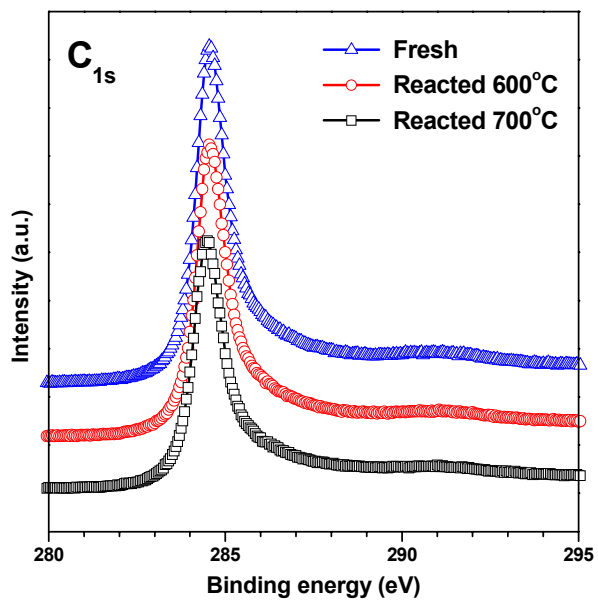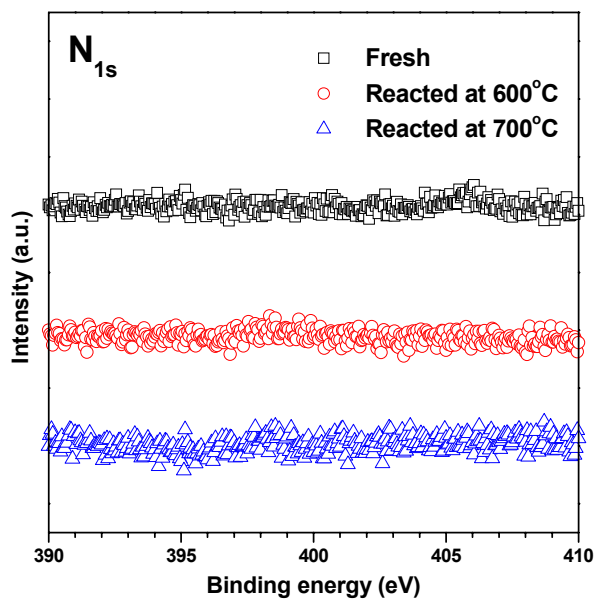

Supplement: b700969k.pdf [file b700969k.pdf]
